# Supplementary material for: Amyloid β aggregation induces human brain microvascular endothelial cell death with abnormal actin organization
Source: PubMed Central journal article supplement (PMC8685982; doi:10.1016/j.bbrep.2021.101189), 2021-12-15
Supplement: mmc1.pdf [file mmc1.pdf]

## Supplementary Materials

### **Amyloid $\beta$ aggregation induces human brain microvascular endothelial cell death with abnormal actin organization**

Yushiro Take<sup>a,b,c,1</sup>, Yusaku Chikai<sup>a,1</sup>, Keiya Shimamori<sup>a</sup>, Masahiro Kuragano<sup>a</sup>, Hiroki Kurita<sup>c</sup>, and Kiyotaka Tokuraku<sup>a,\*</sup>

<sup>a</sup>Graduate School of Engineering, Muroran Institute of Technology, Hokkaido 050-8585, Japan

<sup>b</sup>Ohkawara Neurosurgical Hospital, Hokkaido 050-0082, Japan

<sup>c</sup>Saitama International Medical Center, Department of Cerebrovascular Surgery, Saitama 350-1298, Japan

<sup>1</sup> These authors contributed equally.

\*Address correspondence to: Tokuraku Kiyotaka, Ph.D. (tokuraku@mmm.muroran-it.ac.jp)

## Supplementary Figures

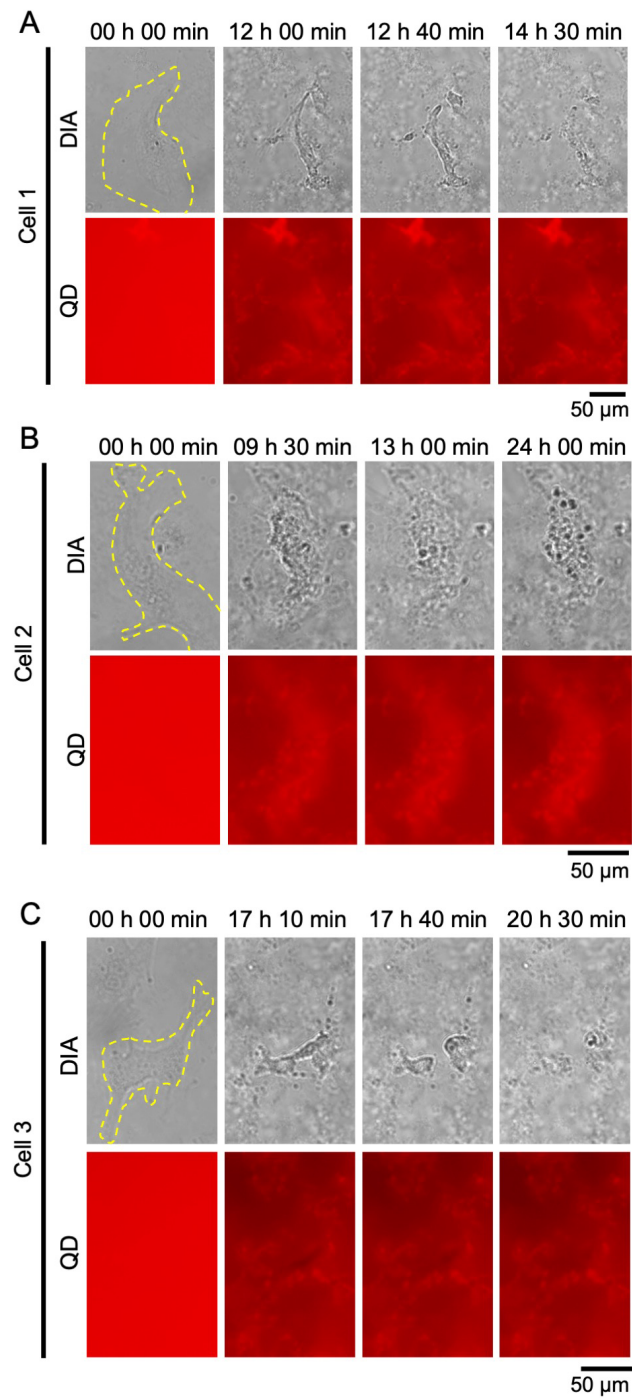

Sup. Fig. S1: A $\beta$  aggregation and endothelial cell death under the same conditions as in Fig 1. hBMECs co-incubated with 20  $\mu$ M A $\beta_{42}$  and 30 nM QDA $\beta$  were observed by an inverted fluorescence microscope. This figure shows another cell, not viewed in Fig. 1. The yellow dotted lines show the outline of endothelial cells.

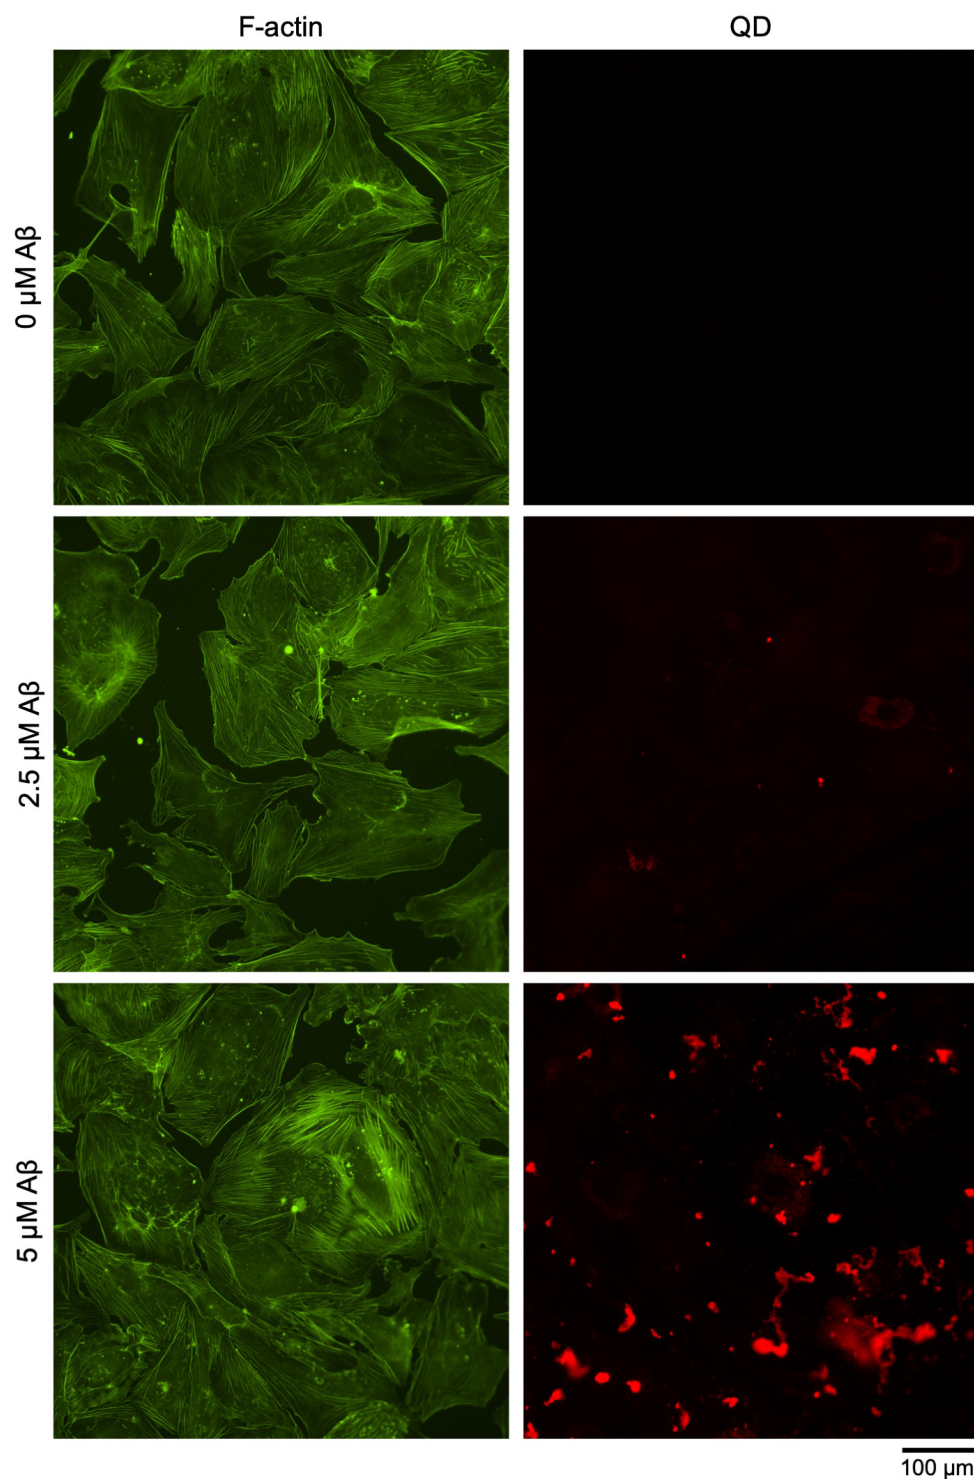

Sup. Fig. S2: Fluorescence images of F-actin in hBMECs and A $\beta$  aggregates under the same conditions as in Fig 4. hBMECs were co-incubated with A $\beta$  of each concentration and 30 nM QDA $\beta$  (red) for 24 h, then stained for F-actin (green) with Alexa 488 Phalloidin. Alexa 488 and QD were imaged by an inverted fluorescence microscope.

## Supplementary Movie Legends

Sup. Movie S1. hBMECs were co-incubated with 20  $\mu\text{M}$   $\text{A}\beta_{42}$  and 30 nM QDA $\beta$ . This movie shows that hBMECs induced cell death by  $\text{A}\beta$  aggregation. White arrowheads indicate hBMECs that caused cell death. Images were captured at a rate of 1 frame/10 min. Playback speed is 15 frames/sec. Still images are displayed in Fig. 1 and Fig. S1. Bar = 100  $\mu\text{m}$ .

Sup. Movie S2. hBMECs were treated with 0.4% DMSO without  $\text{A}\beta_{42}$  (control condition). Images were captured at a rate of 1 frame/10 min. Playback speed is 15 frames/sec. Bar = 50  $\mu\text{m}$ .

Sup. Movie S3. hBMECs were co-incubated with 10  $\mu\text{M}$   $\text{A}\beta_{42}$  and 30 nM QDA $\beta$ . This movie shows that hBMECs were anchored to the plate surface by  $\text{A}\beta$  aggregation. White arrowheads indicate points of cells anchored to the plate surface by  $\text{A}\beta$  aggregates. Images were captured at a rate of 1 frame/10 min. Playback speed is 15 frames/sec. Still images are displayed in Fig. 2A. Bar = 50  $\mu\text{m}$ .

Sup. Movie S4. hBMECs were co-incubated with 5  $\mu\text{M}$   $\text{A}\beta_{42}$  and 30 nM QDA $\beta$ . This movie shows that hBMECs were cut. White arrowhead shows a part of a cell where  $\text{A}\beta_{42}$  aggregated and was broken off. Images were captured at a rate of 1 frame/10 min. Playback speed is 10 frames/sec. Still images are displayed in Fig. 2B. Bar = 50  $\mu\text{m}$ .

Sup. Movie S5. hBMECs were co-incubated with 10  $\mu\text{M}$   $\text{A}\beta_{42}$  and 30 nM QDA $\beta$ . This movie shows that  $\text{A}\beta$  aggregation induced holes in the cell monolayer. Images were captured at a rate of 1 frame/10 min. Playback speed is 15 frames/sec. Still images are displayed in Fig. 3. Bar = 100  $\mu\text{m}$ .
